# Supplementary material for: Quantitative MRI Evaluation of Ferritin Overexpression in Non-Small-Cell Lung Cancer
Source: MDPI journal article supplement (doi:10.3390/ijms25042398), 2024-02-18
Supplement: s1 [file s1]

**Table S1.  $T_2^*$  values correlated with FtH expression used in this study.**

|                                                                                              | $T_2^*$ (ms) | SD    | $^aR^2$ | Doxycycline |
|----------------------------------------------------------------------------------------------|--------------|-------|---------|-------------|
| <b>H1299T</b>                                                                                |              |       |         |             |
| 1                                                                                            | 20.3         | 26.8  | 0.87    | -           |
| 2                                                                                            | 26.9         | 15.8  | 0.95    | -           |
| 3                                                                                            | 35.2         | 45.9  | 0.96    | +           |
| 4                                                                                            | 37.2         | 42.1  | 0.92    | +           |
| 5                                                                                            | 15.8         | 6.1   | 0.97    | +           |
| 6                                                                                            | 34.4         | 39.9  | 0.91    | +           |
| Mean                                                                                         | 28.3         | 29.4  | 0.93    |             |
| <b>Lewis Lung Carcinoma</b>                                                                  |              |       |         |             |
| 1                                                                                            | 19.6         | 17.8  | 0.92    | -           |
| 2                                                                                            | 21.5         | 26.2  | 0.9     | -           |
| 3                                                                                            | 22.9         | 28.6  | 0.87    | +           |
| 4                                                                                            | 17.9         | 12.7  | 0.96    | +           |
| 5                                                                                            | 16.6         | 25.7  | 0.9     | +           |
| 6                                                                                            | 19.7         | 28.5  | 0.9     | +           |
| 7                                                                                            | 24.7         | 32.9  | 0.88    | +           |
| 8                                                                                            | 25.8         | 29.1  | 0.93    | +           |
| 9                                                                                            | 21.5         | 26.2  | 0.9     | +           |
| 10                                                                                           | 16.7         | 15.9  | 0.92    | +           |
| 11                                                                                           | 19.5         | 17.2  | 0.92    | +           |
| Mean                                                                                         | 20.5         | 23.46 | 0.91    |             |
| $^aR^2$ values were generated for each voxel to evaluate the quality of the $T_2^*$ fitting. |              |       |         |             |
